# Supplementary material for: Artichoke Industrial Waste in Durum Wheat Bread: Effects of Two Different Preparation and Drying Methods of Flours and Evaluation of Quality Parameters during Short Storage
Source: MDPI journal article supplement (doi:10.3390/foods12183419), 2023-09-14
Supplement: s1 [file s1]

## Supplementary Materials: factorial ANOVA

**Table S1** - Polyphenols content and antioxidant activity, in pure flours and their integrations at different percentages. Factorial ANOVA for “sample-method”

| Sample          | Polyphenols<br>(mgGAE/g d.m) | DPPH<br>(mg trolox eq/g d.m) |
|-----------------|------------------------------|------------------------------|
| <i>Method A</i> |                              |                              |
| FAB             | 2.82±3.87a                   | 2.66±0.07                    |
| FAS             | 1.04±2.97d                   | 1.94±0.25                    |
| FAM             | 1.57±1.41c                   | 2.07±0.27                    |
| <i>Method B</i> |                              |                              |
| FAB             | 2.17±2.05b                   | 2.02±0.84                    |
| FAS             | 1.48±2.17c                   | 1.68±1.86                    |
| FAM             | 0.80±1.09e                   | 1.20±2.96                    |

Data are expressed as means ± standard deviations. Different letters indicate  $p \leq 0.001$ , no letter not significant.

**Table S2** - Polyphenols content and antioxidant activity, in pure flours and their integrations at different percentages. Factorial ANOVA for “sample-percentages”

| Sample      | Polyphenols<br>(mgGAE/g d.m) | DPPH<br>(mg trolox eq/g d.m) |
|-------------|------------------------------|------------------------------|
| Pure flours |                              |                              |
| FAB         | 8.03±1.22a                   | 7.55±0.29a                   |
| FAS         | 4.16±0.89b                   | 5.80±1.04b                   |
| FAM         | 3.92±1.51b                   | 5.25±3.77b                   |
| Mixes       |                              |                              |
| FAB-5       | 0.45±0.06de                  | 0.42±0.01c                   |
| FAB-7.5%    | 0.65±0.09cd                  | 0.61±0.02c                   |
| FAB-10%     | 0.85±0.31c                   | 0.80±0.03c                   |
| FAS-5%      | 0.26±0.04e                   | 0.36±0.06c                   |
| FAS-7.5%    | 0.15±0.13e                   | 0.48±0.08c                   |
| FAS-10%     | 0.46±0.09de                  | 0.62±0.10c                   |
| FAM-5%      | 0.25±0.08e                   | 0.31±0.19c                   |
| FAM-7.5%    | 0.15±0.04e                   | 0.44±0.28c                   |
| FAM-10%     | 0.44±0.15de                  | 0.57±0.38c                   |

Data are expressed as means ± standard deviations. Different letters indicate  $p \leq 0.001$ , no letter not significant.

**Table S3** - Polyphenols content and antioxidant activity, in pure flours and their integrations at different percentages. Factorial ANOVA for “Percentages-Method”

| Sample          | Polyphenols<br>(mgGAE/g d.m) | DPPH<br>(mg trolox eq/g d.m) |
|-----------------|------------------------------|------------------------------|
| <i>Method A</i> |                              |                              |
| 5%              | 0.36±0.13d                   | 0.42±0.11c                   |
| 7%              | 0.35±0.29d                   | 0.58±0.16c                   |
| 10%             | 0.64±0.26c                   | 0.76±0.21c                   |
| 100%            | 5.90±2.60a                   | 7.15±2.14a                   |
| <i>Method B</i> |                              |                              |
| 5%              | 0.29±0.10d                   | 0.31±0.18c                   |
| 7%              | 0.27±0.22d                   | 0.44±0.26c                   |

|      |             |            |
|------|-------------|------------|
| 10%  | 0.53±0.20cd | 0.57±0.35c |
| 100% | 4.84±1.96b  | 5.25±3.51b |

Data are expressed as means ± standard deviations. Different letters indicate  $p \leq 0.001$ , no letter not significant.

**Table S4** - Colorimetric parameters of the samples of flour produced according to method A and B, at different flour concentrations of bracts, stems and stem-bracts mix (0, 5, 7.5, 10%) as well as 100% bracts, stems and mix. Factorial ANOVA for “sample-percentages”

| Sample   | Brown index  | a*          | b*            |
|----------|--------------|-------------|---------------|
| FAB-5%   | 20.25±2.89e  | -1.22±0.92h | 15.62±0.41ab  |
| FAB-7.5% | 24.23±1.75c  | -0.55±1.59g | 15.76±0.25ab  |
| FAB-10%  | 25.07±1.42bc | -0.42±1.67f | 15.94±0.30a   |
| FAS-5%   | 22.04±1.53d  | -0.18±0.30d | 14.83±0.30cde |
| FAS-7.5% | 24.89±0.94bc | 0.13±0.27b  | 14.51±0.23de  |
| FAS-10%  | 28.18±1.63a  | 0.50±0.19a  | 14.34±0.90e   |
| FAM-5%   | 21.24±0.55de | -0.63±0.56g | 14.99±0.12cd  |
| FAM-7.5% | 23.95±0.43c  | -0.31±0.80e | 15.24±0.12bc  |
| FAM-10%  | 26.10±0.11b  | -0.07±0.82c | 15.18±0.12bc  |

Data are expressed as means ± standard deviations. Different letters indicate ( $p \leq 0.05$  Brown index, b\*;  $p \leq 0.001$  a\*).

**Table S5** - Colorimetric parameters of the samples of flour produced according to method A and B, at different flour concentrations of bracts, stems and stem-bracts mix (0, 5, 7.5, 10%) as well as 100% bracts, stems and mix. Factorial ANOVA for “sample-method”

| Sample          | Brown index | a*          | b*           |
|-----------------|-------------|-------------|--------------|
| <i>Method A</i> |             |             |              |
| FAB             | 23.10±0.57b | -1.94±0.07f | 15.50±0.19ab |
| FAS             | 24.14±3.07b | -0.07±0.35d | 14.91±0.17bc |
| FAM             | 23.51±2.43b | -0.97±0.16e | 15.17±0.13b  |
| <i>Method B</i> |             |             |              |
| FAB             | 23.26±4.28b | 0.48±0.70a  | 16.05±0.12a  |
| FAS             | 25.93±2.69a | 0.36±0.26b  | 14.21±0.59c  |

Data are expressed as means ± standard deviations. Different letters indicate ( $p \leq 0.05$  Brown index;  $p \leq 0.001$  a\*, b\*)

**Table S6** - Colorimetric parameters of the samples of flour produced according to method A and B, at different flour concentrations of bracts, stems and stem-bracts mix (0, 5, 7.5, 10%) as well as 100% bracts, stems and mix. Factorial ANOVA for “Percentages-Method”

| Sample          | Brown index  | a*          | b*         |
|-----------------|--------------|-------------|------------|
| <i>Method A</i> |              |             |            |
| 5%              | 21.41±1.04d  | -1.19±0.70f | 15.15±0.10 |
| 7%              | 23.48±0.72c  | -1.01±0.82e | 15.20±0.39 |
| 10%             | 25.86±1.68ab | -0.77±0.98d | 15.23±0.36 |
| <i>Method B</i> |              |             |            |
| 5%              | 20.95±2.58d  | -0.16±0.22c | 15.15±0.66 |
| 7%              | 25.23±0.71b  | 0.52±0.24b  | 15.14±0.74 |
| 10%             | 27.04±1.78a  | 0.77±0.19a  | 15.08±1.20 |

Data are expressed as means ± standard deviations. Different letters indicate ( $p \leq 0.01$  Brown index;  $p \leq 0.001$  a\*), no letter not significant.

**Table S7**- Physical characteristics of the loaves at different percentages of integration with artichoke flour and staling process from T0 to T4. Factorial ANOVA for “sample-method” a T0

| Campione | Moisture<br>(g/100g) | Volume<br>(cm <sup>3</sup> ) | Height<br>(cm) | Weight<br>(g) | Porosity<br>(1-8)* |
|----------|----------------------|------------------------------|----------------|---------------|--------------------|
|----------|----------------------|------------------------------|----------------|---------------|--------------------|

|                 |              |                |             |             |             |
|-----------------|--------------|----------------|-------------|-------------|-------------|
| <i>Method A</i> |              |                |             |             |             |
| FAB             | 37.78±0.38ab | 269.17±25.38c  | 5.00±0.18c  | 137.52±0.80 | 6.58±0.49a  |
| FAS             | 37.94±0.90ab | 343.33±19.66a  | 5.60±0.16a  | 134.91±0.52 | 5.92±0.80b  |
| FAM             | 38.44±0.77a  | 303.33±23.80b  | 5.40±0.32ab | 135.71±0.81 | 6.75±0.42a  |
| <i>Method B</i> |              |                |             |             |             |
| FAB             | 37.27±0.68b  | 300.00±31.46b  | 5.29±0.21b  | 137.54±0.55 | 6.50±0.63a  |
| FAS             | 38.82±0.94a  | 318.33±12.52ab | 5.47±0.16ab | 135.84±1.07 | 6.25±0.52ab |
| FAM             | 38.81±0.53a  | 297.67±12.21b  | 5.44±0.15ab | 135.89±0.45 | 6.42±0.49ab |

Data are expressed as means ± standard deviations. Different letters indicate ( $p \leq 0.001$  moisture, volume;  $p \leq 0.01$  height;  $p \leq 0.05$  porosity). no letter not significant.

**Table S8** - Physical characteristics of the loaves at different percentages of integration with artichoke flour and staling process from T0 to T4. Factorial ANOVA for “sample-method” a T2

| Campione        | Moisture<br>(g/100g) | Volume<br>(cm <sup>3</sup> ) | Height<br>(cm) | Weight<br>(g) | Porosity<br>(1-8)* |
|-----------------|----------------------|------------------------------|----------------|---------------|--------------------|
| <i>Method A</i> |                      |                              |                |               |                    |
| FAB             | 37.54±1.40           | 258.33±17.22c                | 4.87±0.11b     | 132.45±1.09ab | 6.83±0.52          |
| FAS             | 37.64±1.14           | 317.33±18.13a                | 5.50±0.18a     | 126.84±2.03e  | 6.33±0.41          |
| FAM             | 38.62±0.75           | 290.50±18.52ab               | 5.16±0.42ab    | 130.82±1.17bc | 6.92±0.20          |
| <i>Method B</i> |                      |                              |                |               |                    |
| FAB             | 37.24±1.20           | 271.42±33.11bc               | 5.12±0.26ab    | 133.01±2.97a  | 6.83±0.52          |
| FAS             | 37.87±1.09           | 291.00±14.70ab               | 5.37±0.18a     | 128.54±0.56cd | 6.33±0.41          |
| FAM             | 38.28±0.58           | 278.00±14.28bc               | 4.92±0.31b     | 129.24±0.68cd | 6.67±0.52          |

Data are expressed as means ± standard deviations. Different letters indicate  $p \leq 0.001$ , no letter not significant.

**Table S9** - Physical characteristics of the loaves at different percentages of integration with artichoke flour and staling process from T0 to T4. Factorial ANOVA for “sample-method” a T4

| Campione        | Moisture<br>(g/100g) | Volume<br>(cm <sup>3</sup> ) | Height<br>(cm) | Weight<br>(g) | Porosity<br>(1-8)* |
|-----------------|----------------------|------------------------------|----------------|---------------|--------------------|
| <i>Method A</i> |                      |                              |                |               |                    |
| FAB             | 35.70±1.03a          | 253.33±17.22b                | 4.70±0.08b     | 128.23±1.62b  | 7.38±0.31          |
| FAS             | 31.93±1.48b          | 308.50±24.92a                | 5.39±0.17a     | 122.62±3.62e  | 7.25±0.42          |
| FAM             | 34.14±1.85ab         | 278.42±17.60b                | 5.04±0.38ab    | 125.13±1.79c  | 7.25±0.27          |
| <i>Method B</i> |                      |                              |                |               |                    |
| FAB             | 36.47±1.30a          | 265.33±29.84b                | 5.05±0.26ab    | 129.93±2.18a  | 7.25±0.27          |
| FAS             | 35.73±1.28a          | 273.33±19.19b                | 5.27±0.16a     | 124.64±2.42cd | 7.08±0.49          |
| FAM             | 34.79±1.70a          | 274.00±9.19b                 | 4.79±0.29b     | 123.97±2.35d  | 7.08±0.86          |

Data are expressed as means ± standard deviations. Different letters indicate ( $p \leq 0.05$  moisture;  $p \leq 0.001$  volume, height, weight). no letter not significant.

**Table S10** - Physical characteristics of the loaves at different percentages of integration with artichoke flour and staling process from T0 to T4. Factorial ANOVA for “sample-percentages” a T0

| Sample   | Moisture<br>(g/100g) | Volume<br>(cm <sup>3</sup> ) | Height<br>(cm) | Weight<br>(g) | Porosity<br>(1-8)* |
|----------|----------------------|------------------------------|----------------|---------------|--------------------|
| FAB-5%   | 37.13±0.83           | 317.50±20.62ab               | 5.33±0.24      | 136.92±0.48   | 5.88±0.25cd        |
| FAB-7.5% | 37.66±0.18           | 280.00±20.41cd               | 5.09±0.24      | 137.89±0.41   | 7.00±0.00a         |
| FAB-10%  | 37.79±0.49           | 256.25±17.02d                | 5.03±0.17      | 137.79±0.64   | 6.75±0.29ab        |
| FAS-5%   | 37.30±0.53           | 338.75±20.97a                | 5.66±0.08      | 135.27±0.84   | 5.38±0.48d         |
| FAS-7.5% | 38.92±0.91           | 340.00±17.80a                | 5.56±0.19      | 135.27±1.48   | 6.13±0.25bc        |

|          |            |                |           |             |             |
|----------|------------|----------------|-----------|-------------|-------------|
| FAS-10%  | 38.91±0.42 | 313.75±13.77ab | 5.38±0.09 | 135.60±0.47 | 6.75±0.29ab |
| FAM-5%   | 37.89±0.33 | 317.00±15.90ab | 5.66±0.18 | 136.13±0.70 | 6.13±0.25bc |
| FAM-7.5% | 39.16±0.26 | 304.50±3.32bc  | 5.42±0.16 | 135.57±0.26 | 6.88±0.25a  |
| FAM-10%  | 38.83±0.53 | 280.00±4.08cd  | 5.19±0.10 | 135.70±0.83 | 6.75±0.50ab |

Data are expressed as means  $\pm$  standard deviations. Different letters indicate ( $p \leq 0.01$  volume;  $p \leq 0.05$  porosity), no letter not significant.

**Table S11** - Physical characteristics of the loaves at different percentages of integration with artichoke flour and staling process from T0 to T4. Factorial ANOVA for “sample-percentages” a T2

| Sample   | Moisture<br>(g/100g) | Volume<br>(cm <sup>3</sup> ) | Height<br>(cm) | Weight<br>(g) | Porosity<br>(1-8)* |
|----------|----------------------|------------------------------|----------------|---------------|--------------------|
| FAB-5%   | 36.32±1.57           | 294.38±19.62a                | 5.15±0.32b-e   | 133.62±0.92a  | 6.25±0.29bc        |
| FAB-7.5% | 38.33±0.36           | 257.75±6.08c                 | 4.99±0.15de    | 131.28±2.41b  | 7.25±0.29a         |
| FAB-10%  | 37.51±0.64           | 242.50±13.23c                | 4.85±0.05ef    | 133.30±2.46a  | 7.00±0.00a         |
| FAS-5%   | 37.28±0.24           | 314.00±24.71a                | 5.58±0.06a     | 129.25±0.52c  | 6.00±0.00c         |
| FAS-7.5% | 37.51±1.11           | 311.00±10.98a                | 5.44±0.23ab    | 126.98±1.89d  | 6.25±0.29bc        |
| FAS-10%  | 38.46±1.35           | 287.50±17.56ab               | 5.29±0.13a-d   | 126.84±1.24d  | 6.75±0.29ab        |
| FAM-5%   | 37.72±0.37           | 293.75±18.95ab               | 5.41±0.25abc   | 130.72±1.29bc | 6.38±0.48bc        |
| FAM-7.5% | 38.88±0.60           | 293.25±2.36ab                | 5.09±0.12cde   | 129.53±1.31bc | 7.00±0.00a         |
| FAM-10%  | 38.75±0.26           | 265.75±4.35bc                | 4.63±0.14f     | 129.83±1.07bc | 7.00±0.00a         |

Data are expressed as means  $\pm$  standard deviations. Different letters indicate ( $p \leq 0.05$  height, porosity;  $p \leq 0.01$  volume, weight), no letter not significant.

**Table S12**- Physical characteristics of the loaves at different percentages of integration with artichoke flour and staling process from T0 to T4. Factorial ANOVA for “sample-percentages” a T4

| Sample   | Moisture<br>(g/100g) | Volume<br>(cm <sup>3</sup> ) | Height<br>(cm) | Weight<br>(g) | Porosity<br>(1-8)* |
|----------|----------------------|------------------------------|----------------|---------------|--------------------|
| FAB-5%   | 36.53±1.08           | 286.75±16.60                 | 5.06±0.35bcd   | 129.26±2.26a  | 7.00±0.00          |
| FAB-7.5% | 36.01±0.97           | 253.25±5.38                  | 4.80±0.22de    | 128.72±1.84a  | 7.50±0.00          |
| FAB-10%  | 35.71±1.61           | 238.00±12.62                 | 4.76±0.12de    | 129.27±2.53a  | 7.44±0.31          |
| FAS-5%   | 34.21±2.32           | 310.75±25.33                 | 5.47±0.10a     | 127.19±0.61b  | 6.75±0.29          |
| FAS-7.5% | 33.65±1.42           | 284.50±37.19                 | 5.36±0.12ab    | 122.19±0.16d  | 7.25±0.29          |
| FAS-10%  | 33.63±3.63           | 277.50±6.45                  | 5.16±0.13abc   | 121.52±3.11d  | 7.50±0.41          |
| FAM-5%   | 34.54±1.24           | 288.75±11.93                 | 5.21±0.24abc   | 126.83±0.67b  | 6.75±0.65          |
| FAM-7.5% | 33.17±1.97           | 278.63±3.04                  | 5.01±0.19cd    | 122.41±1.52d  | 7.25±0.65          |
| FAM-10%  | 35.68±1.14           | 261.25±2.99                  | 4.53±0.17e     | 124.41±0.31c  | 7.50±0.41          |

Data are expressed as means  $\pm$  standard deviations. Different letters indicate ( $p \leq 0.05$  height;  $p \leq 0.001$  weight), no letter not significant.

**Table S13** - Texture Profile Analysis data in the five days of storage. Factorial ANOVA for “sample-percentages” a T0

| Sample   | Hardness (N) | Springiness  | Resilience   | Gumminess (N) | Chewiness<br>(N x mm) |
|----------|--------------|--------------|--------------|---------------|-----------------------|
| FAB-5%   | 11.58±2.99bc | 0.98±0.03ab  | 0.66±0.13c   | 34.76±11.65ab | 34.05±11.27b          |
| FAB-7.5% | 13.50±2.09ab | 0.96±0.03abc | 0.75±0.06a   | 33.85±12.76b  | 32.76±13.06c          |
| FAB-10%  | 16.45±3.66a  | 0.95±0.02bc  | 0.76±0.07a   | 38.27±8.83a   | 36.09±7.92a           |
| FAS-5%   | 6.84±3.96e   | 0.98±0.02ab  | 0.67±0.05bc  | 30.99±13.26b  | 30.42±12.51d          |
| FAS-7.5% | 8.09±0.64de  | 0.99±0.01a   | 0.74±0.10ab  | 22.29±9.46cd  | 22.02±9.56ef          |
| FAS-10%  | 9.15±0.63cde | 0.95±0.01abc | 0.70±0.03abc | 22.61±12.75c  | 22.69±13.24e          |
| FAM-5%   | 5.86±2.56e   | 0.94±0.04c   | 0.72±0.06abc | 12.14±2.35e   | 11.21±1.63h           |

|          |               |             |              |              |             |
|----------|---------------|-------------|--------------|--------------|-------------|
| FAM-7.5% | 10.78±1.10bcd | 0.98±0.03ab | 0.71±0.02abc | 18.29±2.91d  | 17.81±3.36g |
| FAM-10%  | 6.96±0.82e    | 0.95±0.05bc | 0.71±0.05abc | 22.32±2.55cd | 21.31±3.08f |

Data are expressed as means  $\pm$  standard deviations. Different letters indicate  $p \leq 0.001$ , no letter not significant.

**Table S14** - Texture Profile Analysis data in the five days of storage. Factorial ANOVA for “sample-method” a T0

| Sample          | Hardness (N) | Springiness | Resilience  | Gumminess (N) | Chewiness (Nxmm) |
|-----------------|--------------|-------------|-------------|---------------|------------------|
| <i>Method A</i> |              |             |             |               |                  |
| FAB             | 16.25±2.69a  | 0.98±0.02a  | 0.69±0.12b  | 33.40±9.30b   | 32.53±9.21b      |
| FAS             | 6.81±2.75c   | 0.97±0.02a  | 0.65±0.02b  | 28.25±13.83c  | 27.59±13.59c     |
| FAM             | 7.54±3.50c   | 0.94±0.05c  | 0.71±0.05ab | 18.36±3.26e   | 17.33±3.78e      |
| <i>Method B</i> |              |             |             |               |                  |
| FAB             | 11.44±2.12b  | 0.94±0.01bc | 0.76±0.06a  | 37.85±11.67a  | 36.07±11.33a     |
| FAS             | 9.25±0.98bc  | 0.97±0.03a  | 0.76±0.06a  | 22.35±9.13d   | 22.50±9.41d      |
| FAM             | 8.19±1.80c   | 0.97±0.02ab | 0.71±0.04ab | 16.80±6.50e   | 16.22±6.42f      |

Data are expressed as means  $\pm$  standard deviations. Different letters indicate  $p \leq 0.001$ , no letter not significant.

**Table S15** - Texture Profile Analysis data in the five days of storage. Factorial ANOVA for “percentages-method” T0

| Sample          | Hardness     | Springiness | Resilience  | Gumminess    | Chewiness    |
|-----------------|--------------|-------------|-------------|--------------|--------------|
| <i>Method A</i> |              |             |             |              |              |
| 5%              | 7.09±5.48c   | 0.96±0.05bc | 0.65±0.09c  | 27.11±12.80b | 26.05±12.88c |
| 7.50%           | 11.45±3.41ab | 1.00±0.01a  | 0.69±0.03bc | 32.06±10.85a | 31.70±10.50b |
| 10%             | 12.06±5.83a  | 0.94±0.03c  | 0.72±0.08b  | 20.84±8.44c  | 19.70±8.10e  |
| <i>Method B</i> |              |             |             |              |              |
| 5%              | 9.09±1.11bc  | 0.97±0.02ab | 0.72±0.05b  | 24.82±16.07b | 24.40±15.66d |
| 7.50%           | 10.13±1.62ab | 0.95±0.02bc | 0.79±0.05a  | 17.56±4.13d  | 16.70±3.72f  |
| 10%             | 9.65±3.28abc | 0.95±0.03bc | 0.72±0.03b  | 34.62±9.81a  | 33.69±8.50a  |

Data are expressed as means  $\pm$  standard deviations. Different letters indicate  $p \leq 0.001$ , no letter not significant.

**Table S16** - Texture Profile Analysis data in the five days of storage. Factorial ANOVA for “sample-percentages” a T2

| Sample   | Hardness (N)  | Springiness | Resilience | Gumminess (N) | Chewiness (N x mm) |
|----------|---------------|-------------|------------|---------------|--------------------|
| FAB-5%   | 14.95±2.20d   | 0.96±0.04a  | 0.76±0.16  | 38.69±14.26c  | 36.68±12.00cd      |
| FAB-7.5% | 30.00±8.66ab  | 0.97±0.01a  | 0.79±0.04  | 29.66±0.78d   | 29.65±0.44de       |
| FAB-10%  | 36.35±13.29a  | 0.96±0.02a  | 0.78±0.02  | 29.71±13.48d  | 28.68±12.88de      |
| FAS-5%   | 16.83±3.14cd  | 0.94±0.01ab | 0.74±0.05  | 29.07±23.17d  | 27.66±22.25de      |
| FAS-7.5% | 25.20±2.44bc  | 0.96±0.06a  | 0.68±0.06  | 48.80±16.21b  | 47.19±14.22b       |
| FAS-10%  | 31.08±1.93ab  | 0.83±0.06b  | 0.70±0.12  | 52.43±46.69ab | 43.33±37.43bc      |
| FAM-5%   | 22.18±5.76bcd | 0.89±0.08ab | 0.76±0.05  | 23.91±4.80d   | 21.44±6.37e        |
| FAM-7.5% | 22.40±8.10bcd | 0.97±0.01a  | 0.78±0.10  | 58.17±9.58a   | 56.72±9.31a        |
| FAM-10%  | 20.53±5.79cd  | 0.96±0.03a  | 0.79±0.02  | 23.54±8.30d   | 23.32±8.57e        |

Data are expressed as means  $\pm$  standard deviations. Different letters indicate  $p \leq 0.001$ , no letter not significant.

**Table S17** - Texture Profile Analysis data in the five days of storage. Factorial ANOVA for “sample-method” a T2

| Sample          | Hardness (N) | Springiness | Resilience | Gumminess (N) | Chewiness (N x mm) |
|-----------------|--------------|-------------|------------|---------------|--------------------|
| <i>Metodo A</i> |              |             |            |               |                    |
| FAB             | 29.17±14.69a | 0.97±0.02   | 0.82±0.07  | 32.33±6.95bc  | 31.78±6.22bc       |
| FAS             | 24.02±5.65a  | 0.92±0.07   | 0.76±0.04  | 27.97±27.05c  | 26.37±25.70c       |
| FAM             | 16.45±1.58b  | 0.94±0.05   | 0.81±0.05  | 36.22±10.66b  | 35.45±10.40b       |
| <i>Metodo B</i> |              |             |            |               |                    |
| FAB             | 25.03±11.00a | 0.96±0.03   | 0.73±0.09  | 33.04±15.04b  | 31.56±13.33bc      |
| FAS             | 24.72±7.85a  | 0.90±0.08   | 0.65±0.06  | 58.90±27.11a  | 52.42±19.06a       |
| FAM             | 26.95±3.53a  | 0.94±0.07   | 0.74±0.05  | 34.19±25.04b  | 32.20±25.23bc      |

Data are expressed as means ± standard deviations. Different letters indicate  $p \leq 0.001$ , no letter not significant.

**Table S18** - Texture Profile Analysis data in the five days of storage. Factorial ANOVA for “percentages-method” T2

| Sample          | Hardness     | Springiness | Resilience | Gumminess     | Chewiness     |
|-----------------|--------------|-------------|------------|---------------|---------------|
| <i>Metodo A</i> |              |             |            |               |               |
| 5%              | 17.53±2.06c  | 0.95±0.06   | 0.82±0.07  | 21.14±9.44d   | 20.54±9.43c   |
| 7.50%           | 20.55±3.99bc | 0.97±0.02   | 0.79±0.07  | 47.43±15.01a  | 45.89±13.61a  |
| 10%             | 31.55±14.06a | 0.92±0.07   | 0.79±0.02  | 27.95±13.16c  | 27.18±12.98c  |
| <i>Metodo B</i> |              |             |            |               |               |
| 5%              | 18.43±6.82c  | 0.91±0.05   | 0.69±0.06  | 39.98±15.68b  | 36.64±16.05b  |
| 7.50%           | 31.18±5.27a  | 0.96±0.04   | 0.71±0.08  | 43.65±17.81ab | 43.16±16.90ab |
| 10%             | 27.08±4.74ab | 0.92±0.09   | 0.73±0.10  | 42.50±39.09ab | 36.38±30.61b  |

Data are expressed as means ± standard deviations. Different letters indicate  $p \leq 0.001$ , no letter not significant.

**Table S19** - Texture Profile Analysis data in the five days of storage. Factorial ANOVA for “sample-percentages” a T4

| Campione | Hardness (N)   | Springiness | Resilience   | Gumminess (N)  | Chewiness (N x mm) |
|----------|----------------|-------------|--------------|----------------|--------------------|
| FAB-5%   | 23.73±5.62cd   | 0.83±0.10   | 0.58±0.19c   | 82.16±24.53cd  | 61.97±25.77bc      |
| FAB-7.5% | 34.15±8.79ab   | 0.85±0.02   | 0.72±0.02a   | 127.53±52.25ab | 98.15±44.14abc     |
| FAB-10%  | 41.18±10.84a   | 0.87±0.03   | 0.71±0.02ab  | 134.36±18.67ab | 89.32±53.75abc     |
| FAS-5%   | 20.33±4.50d    | 0.83±0.06   | 0.72±0.01a   | 62.30±22.48c   | 50.92±23.30c       |
| FAS-7.5% | 37.75±10.85ab  | 0.85±0.02   | 0.69±0.02ab  | 81.78±22.40cd  | 68.22±17.68bc      |
| FAS-10%  | 32.75±6.45abc  | 0.90±0.05   | 0.65±0.10abc | 113.77±25.78bc | 118.46±32.88ab     |
| FAM-5%   | 28.65±14.25bcd | 0.88±0.03   | 0.70±0.02ab  | 76.18±5.89cd   | 70.22±4.69bc       |
| FAM-7.5% | 35.10±16.32ab  | 0.90±0.06   | 0.69±0.07ab  | 158.77±64.69a  | 145.71±65.73a      |
| FAM-10%  | 36.28±5.80ab   | 0.89±0.04   | 0.62±0.04bc  | 128.62±3.75ab  | 112.64±5.12ab      |

Data are expressed as means ± standard deviations. Different letters indicate ( $p \leq 0.001$  springiness, resilience, gumminess;  $p \leq 0.01$  hardness;  $p \leq 0.05$  chewiness), no letter not significant.

**Table S20**- Texture Profile Analysis data in the five days of storage. Factorial ANOVA for “sample-method” a T4

| Campione        | Hardness (N)  | Springiness | Resilience  | Gumminess (N) | Chewiness (N x mm) |
|-----------------|---------------|-------------|-------------|---------------|--------------------|
| <i>Method A</i> |               |             |             |               |                    |
| FAB             | 35.22±11.95ab | 0.82±0.07   | 0.62±0.16d  | 87.52±26.62b  | 71.12±28.64        |
| FAS             | 27.58±9.07bc  | 0.83±0.04   | 0.66±0.08bc | 68.59±26.30c  | 58.19±26.77        |
| FAM             | 23.20±7.26c   | 0.86±0.02   | 0.64±0.04cd | 103.30±20.03b | 91.87±16.85        |
| <i>Method B</i> |               |             |             |               |                    |
| FAB             | 30.82±10.23bc | 0.88±0.03   | 0.72±0.03a  | 141.84±31.89a | 95.17±51.99        |
| FAS             | 32.97±11.70b  | 0.89±0.04   | 0.71±0.03a  | 103.30±25.86b | 100.21±36.81       |

|     |             |           |             |               |              |
|-----|-------------|-----------|-------------|---------------|--------------|
| FAM | 43.48±5.40c | 0.92±0.03 | 0.70±0.05ab | 139.08±64.54a | 127.18±62.29 |
|-----|-------------|-----------|-------------|---------------|--------------|

Data are expressed as means ± standard deviations. Different letters indicate ( $p \leq 0.001$  hardness, springiness;  $p \leq 0.05$  resilience, gumminess), no letter not significant.

**Table S21-** Texture Profile Analysis data in the five days of storage. Factorial ANOVA for “percentages-method” T4

| Sample          | Hardness      | Springiness | Resilience  | Gumminess      | Chewiness      |
|-----------------|---------------|-------------|-------------|----------------|----------------|
| <i>Method A</i> |               |             |             |                |                |
| 5%              | 20.62±6.18d   | 0.79±0.06c  | 0.61±0.15c  | 61.62±17.20d   | 49.20±19.93c   |
| 7.50%           | 25.60±3.90cd  | 0.85±0.02bc | 0.68±0.04ab | 82.87±18.47d   | 70.12±17.53bc  |
| 10%             | 39.78±8.71ab  | 0.87±0.02ab | 0.63±0.08bc | 114.94±12.64bc | 101.85±11.04ab |
| <i>Method B</i> |               |             |             |                |                |
| 5%              | 27.85±10.56cd | 0.90±0.02ab | 0.73±0.01a  | 85.47±14.62cd  | 72.88±12.41bc  |
| 7.50%           | 45.73±4.88a   | 0.88±0.05ab | 0.72±0.04a  | 162.52±51.96a  | 137.93±57.67a  |
| 10%             | 33.68±6.79bc  | 0.91±0.04a  | 0.69±0.04a  | 136.23±19.11ab | 111.76±50.97ab |

Data are expressed as means ± standard deviations. Different letters indicate ( $p \leq 0.001$  hardness, springiness, gumminess;  $p \leq 0.01$  resilience;  $p \leq 0.05$  chewiness), no letter not significant.

**Table S22 -** Factorial ANOVA for “Sampling-Percentage”

| Sample   | Polyphenols<br>(mg GAE/g d.m) | DPPH<br>(mg trolox eq/g d.m) | Water Activity |
|----------|-------------------------------|------------------------------|----------------|
| FAB-5%   | 0.26±0.04c                    | 0.28±0.05cde                 | 0.88±0.03a     |
| FAB-7.5% | 0.32±0.04b                    | 0.34±0.13bcd                 | 0.87±0.01ab    |
| FAB-10%  | 0.47±0.12a                    | 0.48±0.07a                   | 0.77±0.02c     |
| FAS-5%   | 0.14±0.01e                    | 0.22±0.06e                   | 0.76±0.03cd    |
| FAS-7.5% | 0.21±0.04d                    | 0.35±0.08bc                  | 0.81±0.07bc    |
| FAS-10%  | 0.27±0.04c                    | 0.50±0.06a                   | 0.83±0.03ab    |
| FAM-5%   | 0.15±0.02e                    | 0.22±0.09e                   | 0.70±0.08de    |
| FAM-7.5% | 0.20±0.06d                    | 0.28±0.12de                  | 0.67±0.01e     |
| FAM-10%  | 0.27±0.08c                    | 0.40±0.17b                   | 0.69±0.05e     |

Data are expressed as means ± standard deviations. Different letters indicate  $p \leq 0.001$ , no letter not significant.

**Table S23 -** Polyphenols content, antioxidant activity and water activity, in breads with different integration percentages. Factorial ANOVA for “Sampling -Method”

| Sample          | Polyphenols<br>(mg GAE/g d.m) | DPPH<br>(mg trolox eq/g d.m) | Water Activity |
|-----------------|-------------------------------|------------------------------|----------------|
| <i>Method A</i> |                               |                              |                |
| FAB             | 0.40±0.13a                    | 0.44±0.10a                   | 0.83±0.05      |
| FAS             | 0.18±0.04e                    | 0.41±0.12a                   | 0.80±0.05      |
| FAM             | 0.25±0.08c                    | 0.41±0.11a                   | 0.70±0.06      |
| <i>Method B</i> |                               |                              |                |
| FAB             | 0.29±0.07b                    | 0.30±0.10b                   | 0.85±0.06      |
| FAS             | 0.22±0.07d                    | 0.30±0.13b                   | 0.80±0.06      |
| FAM             | 0.16±0.03f                    | 0.19±0.05c                   | 0.68±0.05      |

Data are expressed as means ± standard deviations. Different letters indicate  $p \leq 0.001$ , no letter not significant.

**Table S24** - Polyphenols content, antioxidant activity and water activity, in breads with different integration percentages. Factorial ANOVA for “Percentage-Sampling”

| Sample          | Polyphenols<br>(mg GAE/g d.m) | DPPH<br>(mg trolox eq/g d.m) | Water Activity |
|-----------------|-------------------------------|------------------------------|----------------|
| <i>Method A</i> |                               |                              |                |
| 5%              | 0.20±0.07e                    | 0.29±0.03c                   | 0.81±0.05a     |
| 7.50%           | 0.26±0.08c                    | 0.41±0.03b                   | 0.76±0.09ab    |
| 10%             | 0.38±0.16a                    | 0.54±0.00a                   | 0.76±0.09b     |
| <i>Method B</i> |                               |                              |                |
| 5%              | 0.16±0.05f                    | 0.18±0.05d                   | 0.75±0.12b     |
| 7.50%           | 0.23±0.06d                    | 0.23±0.05d                   | 0.80±0.10ab    |
| 10%             | 0.29±0.08b                    | 0.37±0.10b                   | 0.78±0.04ab    |

Data are expressed as means ± standard deviations. Different letters indicate  $p \leq 0.001$ , no letter not significant.
